# Supplementary material for: Wyner–Ziv to Baseline H.264 Video Transcoder
Source: Springer Nature journal article supplement (doi:10.1186/1687-6180-2012-135), 2012-07-09

# NETWORK

**WZ Encoder  
(low complexity)**

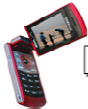

WZ stream

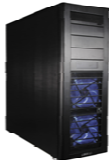

WZ to H.264 Transcoder  
(high complexity)

H.264 stream

**H.264 Decoder  
(low complexity)**

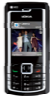

Supplement: 13634_2011_282_MOESM1_ESM.pdf [file 13634_2011_282_MOESM1_ESM.pdf]
