# Supplementary material for: Wyner–Ziv to Baseline H.264 Video Transcoder
Source: Springer Nature journal article supplement (doi:10.1186/1687-6180-2012-135), 2012-07-09

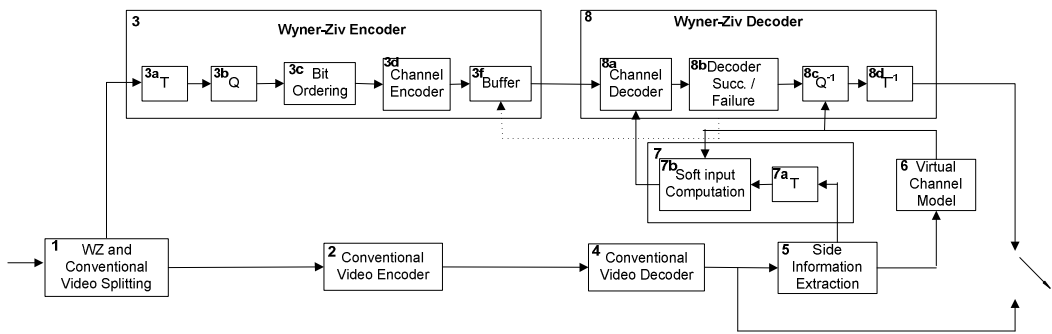

Supplement: 13634_2011_282_MOESM2_ESM.pdf [file 13634_2011_282_MOESM2_ESM.pdf]
