# Supplementary material for: Wyner–Ziv to Baseline H.264 Video Transcoder
Source: Springer Nature journal article supplement (doi:10.1186/1687-6180-2012-135), 2012-07-09
Supplement: 13634_2011_282_MOESM3_ESM.pdf [file 13634_2011_282_MOESM3_ESM.pdf]

16

16

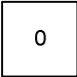

16x16

8

8

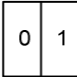

16x8

0

1

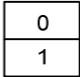

8x16

0

1

2

3

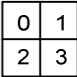

8x8
