# Supplementary material for: Wyner–Ziv to Baseline H.264 Video Transcoder
Source: Springer Nature journal article supplement (doi:10.1186/1687-6180-2012-135), 2012-07-09
Supplement: 13634_2011_282_MOESM9_ESM.pdf [file 13634_2011_282_MOESM9_ESM.pdf]

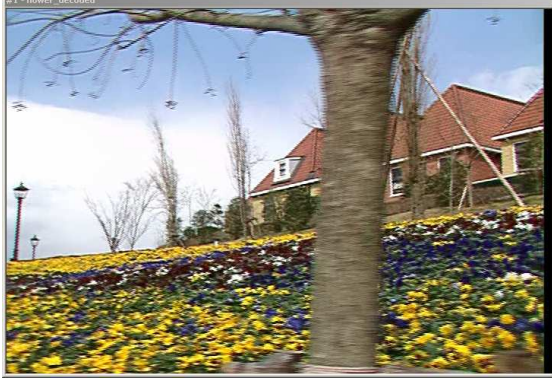

a.

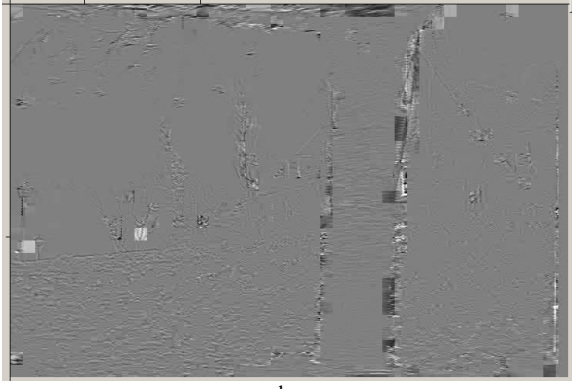

b.

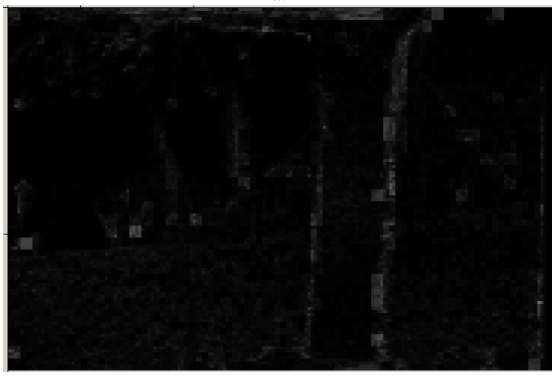

c.

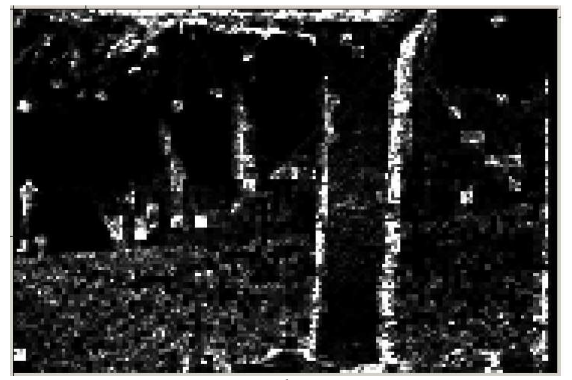

d.

-  Intra Macroblock
-  Inter 16x16 Macroblock
-  Inter 8x8 Macroblock
-  Inter 16x8 Macroblock
-  Inter 8x8 Sub-macroblock
-  Inter 8x4 Sub-macroblock
-  Inter 4x8 Sub-macroblock
-  Inter 4x4 Sub-macroblock
-  Inter 8x16 Macroblock
-  Skip Macroblock

e.

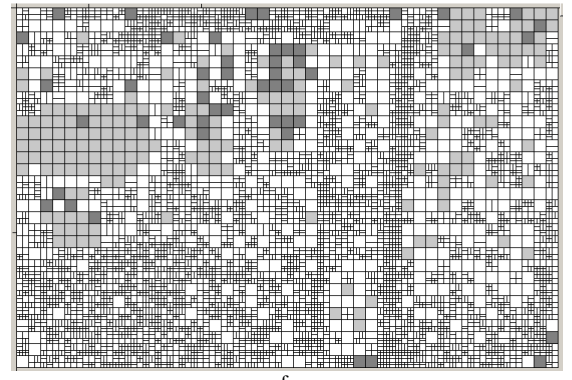

f.

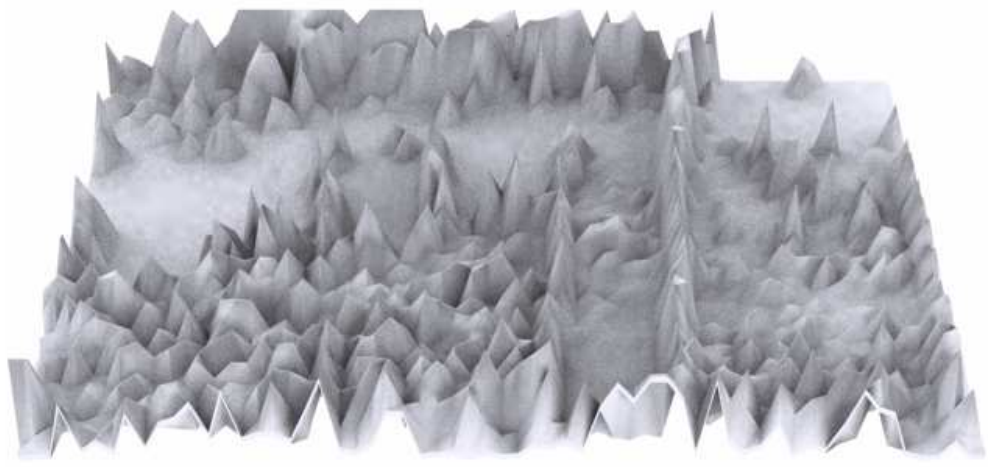

g.
