# Supplementary material for: Wyner–Ziv to Baseline H.264 Video Transcoder
Source: Springer Nature journal article supplement (doi:10.1186/1687-6180-2012-135), 2012-07-09
Supplement: 13634_2011_282_MOESM10_ESM.pdf [file 13634_2011_282_MOESM10_ESM.pdf]

WZ Video  
Sequence

WZ Decoder

Pixel data

H.264 Encoder

16x16 residual,  
means of the variance,  
variance of the means,  
kelastic, \_MVlength

H.264 MB  
Coding Modes

Data Mining Tools

Decision Trees
