# Supplementary material for: Wyner–Ziv to Baseline H.264 Video Transcoder
Source: Springer Nature journal article supplement (doi:10.1186/1687-6180-2012-135), 2012-07-09
Supplement: 13634_2011_282_MOESM11_ESM.pdf [file 13634_2011_282_MOESM11_ESM.pdf]

WZ  
Information



```
graph TD; A[WZ Information] --> B((Decision Tree)); B --> C((Skip  
16x16  
16x8  
8x16)); B --> D((8x8  
8x4  
4x8  
4x4));
```

Decision  
Tree

Skip  
16x16  
16x8  
8x16

8x8  
8x4  
4x8  
4x4
