# Supplementary material for: Wyner–Ziv to Baseline H.264 Video Transcoder
Source: Springer Nature journal article supplement (doi:10.1186/1687-6180-2012-135), 2012-07-09
Supplement: 13634_2011_282_MOESM12_ESM.pdf [file 13634_2011_282_MOESM12_ESM.pdf]

```
if((meansofvariances4x4 >= 280.86) && (residual16x16 >= 2109)) return HIGH_COMPLEXITY;
```

```
if((_vectorlength >= 2.83) && (meansofvariances4x4 >= 595.22)) return HIGH_COMPLEXITY;
```

```
if( (meansofvariances4x4 >= 439.07) && (kelastic >= 6.82)) return HIGH_COMPLEXITY;
```

```
if((_vectorlength >= 2) && (meansofvariances4x4 >= 384.40) && (kelastic >= 5.81) return HIGH_COMPLEXITY;
```

```
if((meansofvariances4x4 >= 280.86) && (_vectorlength >= 2) && (residual16x16 <= 1554) && (residual16x16 >= 1109) && (varianceofmeans4x4 <= 3351.37))return HIGH_COMPLEXITY;
```

```
Otherwise: return LOW_COMPLEXITY
```
