# Supplementary material for: Wyner–Ziv to Baseline H.264 Video Transcoder
Source: Springer Nature journal article supplement (doi:10.1186/1687-6180-2012-135), 2012-07-09
Supplement: 13634_2011_282_MOESM14_ESM.pdf [file 13634_2011_282_MOESM14_ESM.pdf]

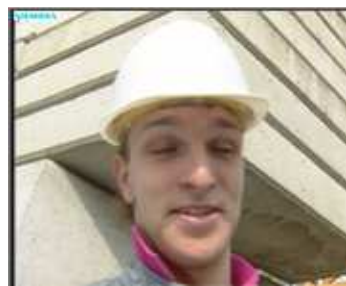

a. Foreman

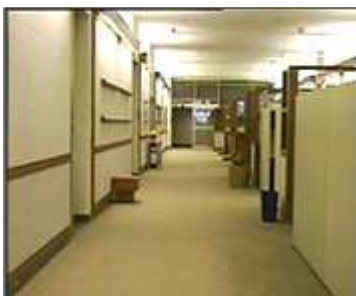

b. Hall

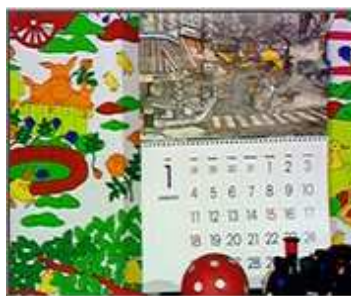

c. Mobile

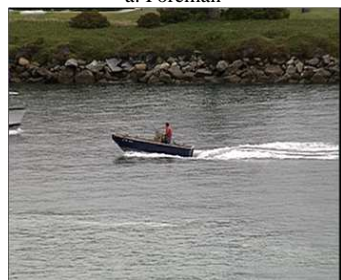

d. Coastguard

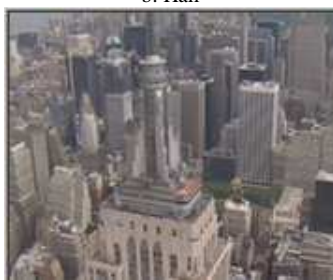

e. City

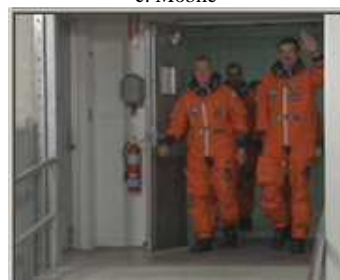

f. Crew

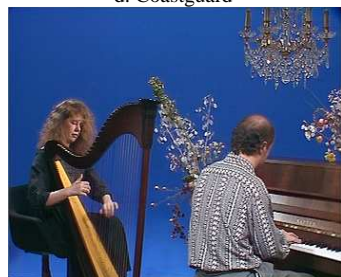

g. Harp

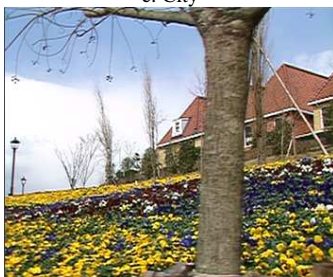

h. Flower

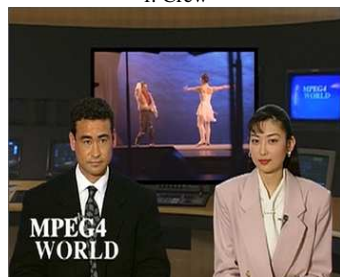

i. News

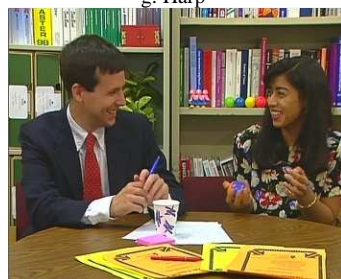

j. Paris

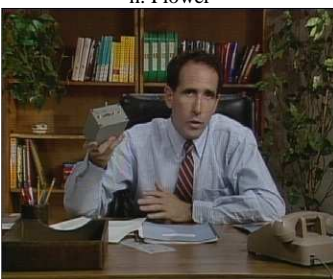

k. Salesman

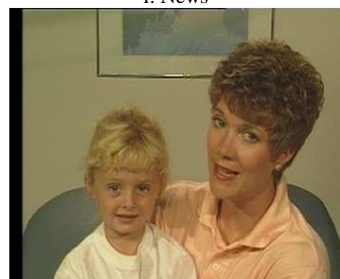

l. Mother
