# Supplementary material for: Wyner–Ziv to Baseline H.264 Video Transcoder
Source: Springer Nature journal article supplement (doi:10.1186/1687-6180-2012-135), 2012-07-09
Supplement: 13634_2011_282_MOESM15_ESM.pdf [file 13634_2011_282_MOESM15_ESM.pdf]

Sequences QCIF GOP 2 (176x144, 15 Hz)

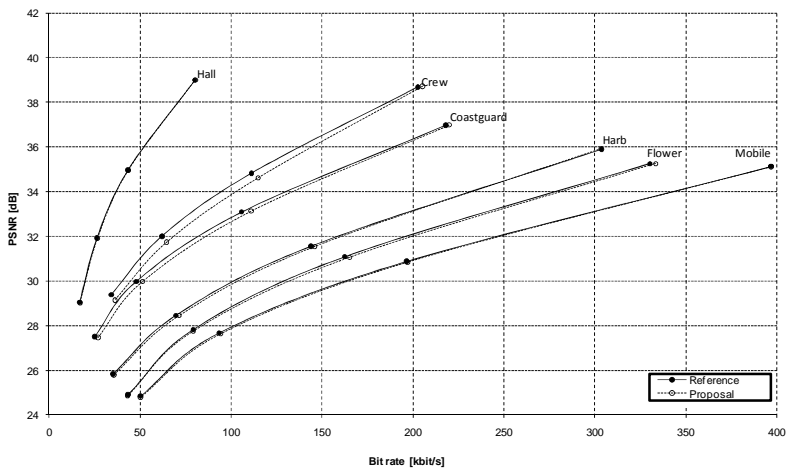

(a)

Sequences QCIF GOP 4 (176x144, 15 Hz)

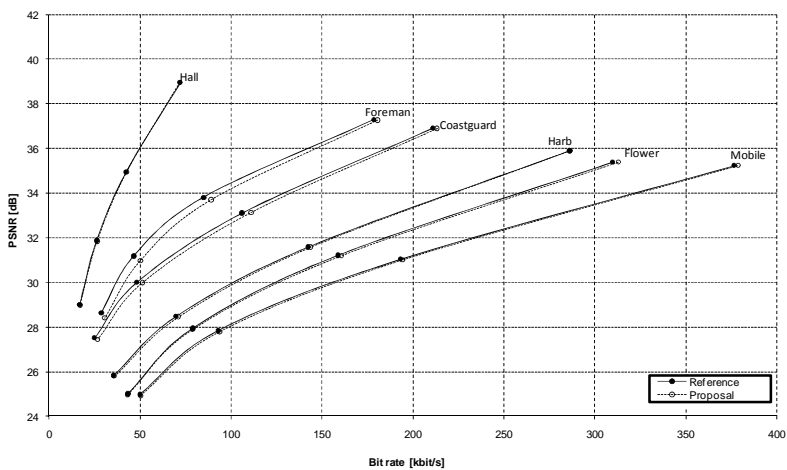

(b)

Sequences QCIF GOP 8 (176x144, 15 Hz)

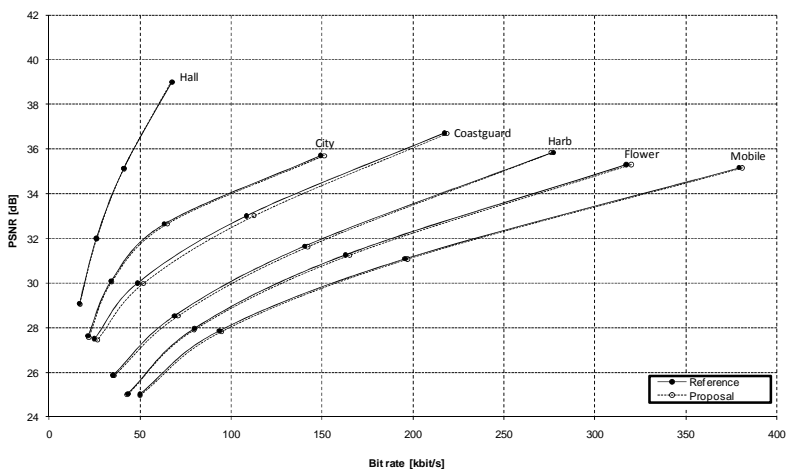

(c)
