# Supplementary material for: Wyner–Ziv to Baseline H.264 Video Transcoder
Source: Springer Nature journal article supplement (doi:10.1186/1687-6180-2012-135), 2012-07-09
Supplement: 13634_2011_282_MOESM17_ESM.pdf [file 13634_2011_282_MOESM17_ESM.pdf]

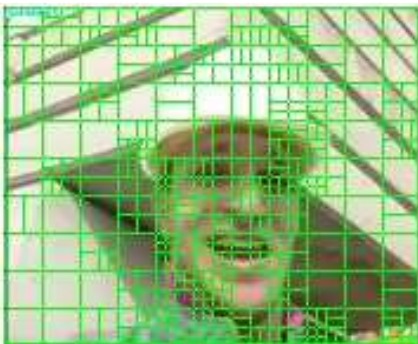

a. Reference QP = 28, GOP 2, 30 Hz, 17th frame (P frame).

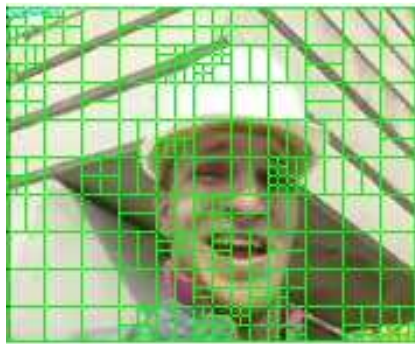

b. Proposed QP = 28, GOP 2, 30 Hz, 17th frame (P frame).

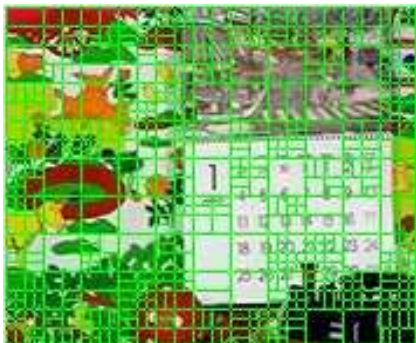

c. Reference QP = 28, GOP 2, 15 Hz, 17th frame (P frame).

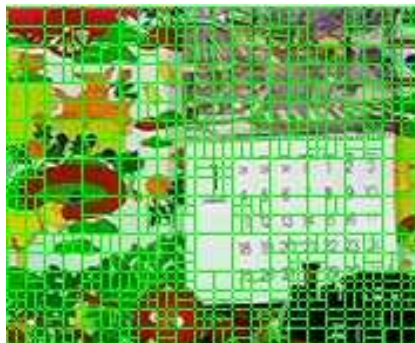

d. Proposed QP = 28, GOP 2, 15 Hz, 17th frame (P frame).

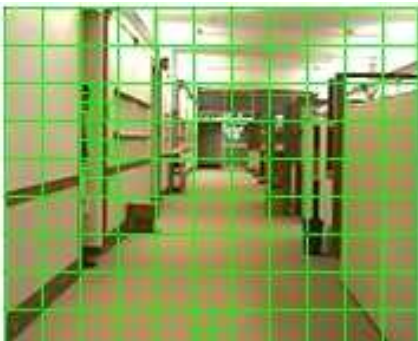

e. Reference QP = 28, GOP 2, 30 Hz, 17th frame (P frame).

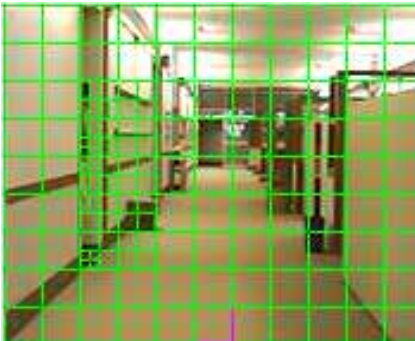

f. Proposed QP = 28, GOP 2, 30 Hz, 17th frame (P frame).
